# Supplementary material
Source: ML conference proceedings conference paper supplement (https://proceedings.mlr.press/v139/li21x.html)
Supplement: Supplementary file [file li21x-supp.pdf]

---

# Supplementary Materials for “Asymptotic Normality and Confidence Intervals for Prediction Risks of the Min-Norm Least Squares Estimator”

---

Zeng Li<sup>1</sup> Chuanlong Xie<sup>2</sup> Qinwen Wang<sup>3</sup>

The Supplementary materials contain the proofs of Theorems 4.1–4.5 and some additional simulation experiments.

## 1. Proof of Theorem 4.1 and Theorem 4.2

Let  $\mathbf{X} = \mathbf{Z}\Sigma^{1/2}$ . According to the Bai-Yin theorem (Bai & Yin, 2008), the smallest eigenvalue of  $\mathbf{Z}^T\mathbf{Z}/n$  is almost surely larger than  $(1 - \sqrt{c})^2/2$  for sufficiently large  $n$ . Thus

$$\lambda_{\min}\left(\frac{1}{n}\mathbf{X}^T\mathbf{X}\right) \geq c_0\lambda_{\min}\left(\frac{1}{n}\mathbf{Z}^T\mathbf{Z}\right) \geq \frac{c_0}{2}(1 - \sqrt{c})^2,$$

which implies that the matrix  $\mathbf{X}^T\mathbf{X}/n$  is almost surely invertible for large  $n$ . By Section 3.2,

$$\begin{aligned} B_{\mathbf{X}}(\hat{\beta}, \beta) &= B_{\mathbf{X},\beta}(\hat{\beta}, \beta) = 0 \\ V_{\mathbf{X}}(\hat{\beta}, \beta) &= V_{\mathbf{X},\beta}(\hat{\beta}, \beta). \end{aligned}$$

The first equality holds since  $\Pi = \mathbf{0}$ . Thus the asymptotic of  $R_{\mathbf{X}}(\hat{\beta}, \beta)$  is same to that of  $R_{\mathbf{X},\beta}(\hat{\beta}, \beta)$ . For simplicity, we focus on  $R_{\mathbf{X}}(\hat{\beta}, \beta)$  in the following. Notice that

$$\begin{aligned} V_{\mathbf{X}}(\hat{\beta}, \beta) &= \frac{\sigma^2}{n} \text{Tr}(\hat{\Sigma}^{-1}\Sigma) \\ &= \frac{\sigma^2}{n} \text{Tr}\left(\Sigma^{-1/2}\left(\frac{\mathbf{Z}^T\mathbf{Z}}{n}\right)^{-1}\Sigma^{-1/2}\Sigma\right) \\ &= \frac{\sigma^2}{n} \sum_{i=1}^p \frac{1}{s_i} = \frac{\sigma^2 p}{n} \int \frac{1}{s} dF_{\mathbf{Z}}(s) \end{aligned}$$

where  $s_i$ 's are eigenvalues of  $\mathbf{Z}^T\mathbf{Z}/n$ .  $F_{\mathbf{Z}}$  is the spectral measure of  $\mathbf{Z}^T\mathbf{Z}/n$ . According to the convergence of empirical spectral distributions of sample covariance matrices  $F_{\mathbf{Z}}$  established in Yin (1986), as  $n, p \rightarrow \infty$  such that  $p/n = c_n \rightarrow c \in (0, \infty)$ ,  $F_{\mathbf{Z}}(x)$  weakly converges to the standard Marcenko-Pastur law  $F_c(x)$  and

$$V_{\mathbf{X}}(\hat{\beta}, \beta) \rightarrow \sigma^2 c \int \frac{1}{s} dF_c(s) = \sigma^2 \frac{c}{1-c}.$$

---

<sup>1</sup>First author, Department of Statistics and Data Science, Southern University of Science and Technology, China <sup>2</sup>Noah Ark Lab, Huawei Technology, Hong Kong <sup>3</sup>Corresponding author, School of Data Science, Fudan University, China. Correspondence to: Qinwen Wang <wqw@fudan.edu.cn>.

Here the standard Marcenko-Pastur law  $F_c(x)$  has a density function

$$p_c(x) = \begin{cases} \frac{1}{2\pi cx} \sqrt{(b-x)(x-a)}, & \text{if } a \leq x \leq b, \\ 0, & \text{o.w.,} \end{cases}$$

where  $a = (1 - \sqrt{c})^2$ ,  $b = (1 + \sqrt{c})^2$  and  $p_c(x)$  has a point mass  $1 - \frac{1}{c}$  at the origin if  $c > 1$ . Hence

$$\begin{aligned} R_{\mathbf{X}}(\hat{\beta}, \beta) - \sigma^2 \frac{c_n}{1-c_n} &= \frac{\sigma^2 p}{n} \int \frac{1}{s} dF_{\mathbf{Z}}(s) - \sigma^2 c_n \int \frac{1}{s} dF_{c_n}(s) \\ &= \sigma^2 c_n \int \frac{1}{s} (dF_{\mathbf{Z}}(s) - dF_{c_n}(s)). \end{aligned}$$

According to Theorem 1.1 of Bai & Silverstein (2004),

$$p\left(R_{\mathbf{X}}(\hat{\beta}, \beta) - \sigma^2 \frac{c_n}{1-c_n}\right) \xrightarrow{d} N(\mu_c, \sigma_c^2), \quad (1)$$

where

$$\begin{aligned} \mu_c &= -\frac{\sigma^2 c}{2\pi i} \oint_{\mathcal{C}} \frac{1}{z} \frac{c \underline{m}(z)^3 (1 + \underline{m}(z))^{-3}}{\{1 - c \underline{m}(z)^2 (1 + \underline{m}(z))^{-2}\}^2} dz \quad (2) \\ &\quad - \frac{\sigma^2 c (\nu_4 - 3)}{2\pi i} \oint_{\mathcal{C}} \frac{1}{z} \frac{c \underline{m}(z)^3 (1 + \underline{m}(z))^{-3}}{1 - c \underline{m}(z)^2 (1 + \underline{m}(z))^{-2}} dz, \\ \sigma_c^2 &= -\frac{\sigma^4 c^2}{2\pi^2} \oint_{\mathcal{C}_1} \oint_{\mathcal{C}_2} \frac{1}{z_1 z_2} \frac{1}{(\underline{m}(z_1) - \underline{m}(z_2))^2} \quad (3) \\ &\quad \times \frac{d}{dz_1} \underline{m}(z_1) \frac{d}{dz_2} \underline{m}(z_2) dz_1 dz_2 \\ &\quad - \frac{\sigma^4 c^3 (\nu_4 - 3)}{4\pi^2} \oint_{\mathcal{C}_1} \oint_{\mathcal{C}_2} \frac{1}{z_1 z_2} \frac{1}{(1 + \underline{m}(z_1))^2} \\ &\quad \times \frac{1}{(1 + \underline{m}(z_2))^2} d\underline{m}(z_1) d\underline{m}(z_2). \end{aligned}$$

Here the contours in (2) and (3) are closed and taken in the positive direction in the complex plane, enclosing the support of  $F_c^{c,H}$ . The Stieltjes transform  $\underline{m}(z)$  satisfies the equation

$$z = -\frac{1}{\underline{m}} + \frac{c}{1 + \underline{m}}.$$

To further simplify the integrations in  $\mu_c$  and  $\sigma_c$ , let  $z = 1 + \sqrt{c}(r\xi + \frac{1}{r\xi}) + c$  and perform change of variables, then

we have

$$\begin{aligned}\underline{m}(z) &= -\frac{1}{1 + \sqrt{cr}\xi}, \\ dz &= \sqrt{c}\left(r - \frac{1}{r\xi^2}\right)d\xi, \\ \underline{dm} &= \frac{\sqrt{cr}}{(1 + \sqrt{cr}\xi)^2}d\xi\end{aligned}$$

and when  $\xi$  moves along the unit circle  $|\xi| = 1$  on the complex plane,  $z$  will orbit around the center point  $1 + c$  along an ellipse which enclosing the support of  $F^{c,H}$ . Thus

$$\begin{aligned}\mu_c &= -\frac{\sigma^2 c}{2\pi i} \oint_{|\xi|=1} \frac{cm^3(1+m)}{z\{(1+m)^2 - cm^2\}^2} \\ &\quad \times \sqrt{c}\left(r - \frac{1}{r\xi^2}\right)d\xi \\ &= \frac{\sigma^2 c}{2\pi i} \oint_{|\xi|=1} \frac{1}{r(\sqrt{c} + r\xi)(1 + \sqrt{cr}\xi)} \\ &\quad \times \frac{1}{\left(\xi - \frac{1}{r}\right)\left(\xi + \frac{1}{r}\right)} d\xi \\ &\quad + \frac{\sigma^2 c(\nu_4 - 3)}{2\pi i} \oint_{|\xi|=1} \frac{1}{r\xi^2(\sqrt{c} + r\xi)} \\ &\quad \times \frac{1}{(1 + \sqrt{cr}\xi)} d\xi \\ &= \frac{\sigma^2 c^2}{(c-1)^2} + \frac{\sigma^2 c^2(\nu_4 - 3)}{1-c}.\end{aligned}$$

As for  $\sigma_c^2$ , note that

$$\begin{aligned}&\frac{1}{2\pi i} \oint_{\mathcal{C}_1} \frac{1}{z_1(\underline{m}_1 - \underline{m}_2)^2} d\underline{m}_1 \\ &= \frac{1}{2\pi i} \oint_{|\xi_1|=1} \frac{1}{1 + \sqrt{c}(r_1\xi_1 + \frac{1}{r_1\xi_1}) + c} \\ &\quad \times \frac{\sqrt{c}r_1}{\left(\underline{m}_2 + \frac{1}{1 + \sqrt{cr_1}\xi_1}\right)^2(1 + \sqrt{cr_1}\xi_1)^2} d\xi_1 \\ &= \frac{1}{2\pi i} \oint_{|\xi_1|=1} \frac{\sqrt{c}r_1\xi_1}{\left(\xi_1 + \frac{\sqrt{c}}{r_1}\right)(r_1\xi_1\sqrt{c} + 1)} \\ &\quad \times \frac{1}{\left((r_1\xi_1\sqrt{c} + 1)\underline{m}_2 + 1\right)^2} d\xi_1 \\ &= \frac{1}{(c-1)\left((c-1)\underline{m}_2 - 1\right)^2},\end{aligned}$$

therefore

$$\begin{aligned}&-\frac{\sigma^4 c^2}{2\pi^2} \iint \frac{1}{z_1 z_2 (\underline{m}_1 - \underline{m}_2)^2} d\underline{m}_1 d\underline{m}_2 \\ &= \frac{2\sigma^4 c^2}{2\pi i} \oint_{|\xi_2|=1} \frac{c}{z_2(c-1)\{(c-1)\underline{m}_2 - 1\}^2} d\underline{m}_2 \\ &= \frac{2\sigma^4 c^2}{2\pi i} \oint_{|\xi_2|=1} \frac{\sqrt{c}r_2^2\xi_2}{(c-1)(1 + \sqrt{c}r_2\xi_2)(\sqrt{c} + r_2\xi_2)^3} d\xi_2 \\ &= \frac{2c^3\sigma^4}{(c-1)^4}.\end{aligned}$$

Meanwhile,

$$\begin{aligned}&\frac{1}{2\pi i} \oint_{\mathcal{C}_1} \frac{1}{z_1} \frac{1}{(1 + \underline{m}(z_1))^2} d\underline{m}(z_1) \\ &= \frac{1}{2\pi i} \oint_{|\xi|=1} \frac{1}{\sqrt{c}\xi(1 + \sqrt{cr}\xi)(\sqrt{c} + r\xi)} d\xi \\ &= \frac{1}{c-1},\end{aligned}$$

hence

$$\begin{aligned}&-\frac{\sigma^4 c^3(\nu_4 - 3)}{4\pi^2} \left( \oint_{\mathcal{C}_1} \frac{1}{z_1} \frac{1}{(1 + \underline{m}(z_1))^2} d\underline{m}(z_1) \right)^2 \\ &= \sigma^4 c^3(\nu_4 - 3) \times \frac{1}{(1-c)^2}.\end{aligned}$$

Then we have,

$$\sigma_c^2 = \frac{2c^3\sigma^4}{(c-1)^4} + \frac{\sigma^4 c^3(\nu_4 - 3)}{(1-c)^2}.$$

Let

$$T_n = \frac{p}{\sigma_c} \left( R_{\mathbf{X}}(\hat{\boldsymbol{\beta}}, \boldsymbol{\beta}) - \sigma^2 \frac{c_n}{1-c_n} - \frac{\mu_c}{p} \right).$$

According to (1), we have

$$\begin{aligned}&P(L_{\alpha,c} \leq R_{\mathbf{X},\boldsymbol{\beta}}(\hat{\boldsymbol{\beta}}, \boldsymbol{\beta}) \leq U_{\alpha,c}) \\ &= P(-Z_{\alpha/2} \leq T_n \leq Z_{\alpha/2}) \\ &\rightarrow 1 - \alpha,\end{aligned}$$

where

$$\begin{aligned}L_{\alpha,c} &= \sigma^2 \frac{c_n}{1-c_n} + \frac{1}{p}(\mu_c - Z_{\alpha/2}\sigma_c), \\ U_{\alpha,c} &= \sigma^2 \frac{c_n}{1-c_n} + \frac{1}{p}(\mu_c + Z_{\alpha/2}\sigma_c).\end{aligned}$$

□

## 2. Proof of Theorem 4.3

Notice that

$$\begin{aligned}B_{\mathbf{X}}(\hat{\boldsymbol{\beta}}, \boldsymbol{\beta}) &= \boldsymbol{\beta}^T (\mathbf{I}_p - \hat{\boldsymbol{\Sigma}}^+ \hat{\boldsymbol{\Sigma}}) \boldsymbol{\beta} \\ &= \lim_{z \rightarrow 0^+} \boldsymbol{\beta}^T (\mathbf{I}_p - (\hat{\boldsymbol{\Sigma}} + z\mathbf{I}_p)^{-1} \hat{\boldsymbol{\Sigma}}) \boldsymbol{\beta} \\ &= \lim_{z \rightarrow 0^+} z \boldsymbol{\beta}^T (\hat{\boldsymbol{\Sigma}} + z\mathbf{I}_p)^{-1} \boldsymbol{\beta}.\end{aligned}$$

Since  $\beta$  is a constant vector, we can make use of the results in Theorem 3 in Bai et al. (2007) and Theorem 1.3 in Pan & Zhou (2008) regarding eigenvectors. Their works investigate the sample covariance matrix

$$\mathbf{A}_p = \mathbf{T}_p^{1/2} \mathbf{X}_p^\top \mathbf{X}_p \mathbf{T}_p^{1/2} / n,$$

where  $\mathbf{T}_p$  is an  $p \times p$  nonnegative definite Hermitian matrix with a square root  $\mathbf{T}_p^{1/2}$  and  $\mathbf{X}_p$  is an  $n \times p$  matrix with i.i.d. entries  $(x_{ij})_{n \times p}$ . Let  $\mathbf{U}_p \mathbf{\Lambda}_p \mathbf{U}_p^\top$  denote the spectral decomposition of  $\mathbf{A}_p$  where  $\mathbf{\Lambda}_p = \text{diag}(\lambda_1, \dots, \lambda_p)$  and  $\mathbf{U}_p$  is a unitary matrix consisting of the orthonormal eigenvectors of  $\mathbf{A}_p$ . Assume that  $\mathbf{x}_p$  is an arbitrary nonrandom unit vector and  $\mathbf{y} = (y_1, y_2, \dots, y_p)^\top = \mathbf{U}_p^\top \mathbf{x}_p$ , two empirical distribution functions based on eigenvectors and eigenvalues are defined as

$$\begin{aligned} F_1^{\mathbf{A}_p}(x) &= \sum_{i=1}^p |y_i|^2 \mathbb{1}(\lambda_i \leq x), \\ F^{\mathbf{A}_p}(x) &= \frac{1}{p} \sum_{i=1}^p \mathbb{1}(\lambda_i \leq x). \end{aligned}$$

Then for a bounded continuous function  $g(x)$ , we have

$$\begin{aligned} &\sum_{j=1}^p |y_j|^2 g(\lambda_j) - \frac{1}{p} \sum_{j=1}^p g(\lambda_j) \\ &= \int g(x) dF_1^{\mathbf{A}_p}(x) - \int g(x) dF^{\mathbf{A}_p}(x). \end{aligned}$$

The results in Bai et al. (2007) and Pan & Zhou (2008) are summarized in the following lemma.

**Lemma 2.1. (Theorem 3 (Bai et al., 2007) and Theorem 1.3 (Pan & Zhou, 2008))** Suppose that

- (1)  $x_{ij}$ 's are i.i.d. satisfying  $\mathbb{E}(x_{ij}) = 0$ ,  $\mathbb{E}(|x_{ij}|^2) = 1$  and  $\mathbb{E}(|x_{ij}|^4) < \infty$ ;
- (2)  $\mathbf{x}_p \in \mathbb{C}^p$ ,  $\|\mathbf{x}_p\| = 1$ ,  $\lim_{n,p \rightarrow \infty} p/n = c \in (0, \infty)$ ;
- (3)  $\mathbf{T}_p$  is nonrandom Hermitian non-negative definite with its spectral norm bounded in  $p$ , with  $H_p = F^{\mathbf{T}_p} \xrightarrow{d} H$  a proper distribution function and  $\mathbf{x}_p^\top (\mathbf{T}_p - z\mathbf{I}_p)^{-1} \mathbf{x}_p \rightarrow m_{FH}(z)$ , where  $m_{FH}(z)$  denotes the Stieltjes transform of  $H(t)$ ;
- (4)  $g_1, \dots, g_k$  are analytic functions on an open region of the complex plain which contains the real interval

$$\left[ \liminf_p \lambda_{\min}(\mathbf{T}_p) \mathbb{1}_{(0,1)}(c)(1 - \sqrt{c})^2, \limsup_p \lambda_{\max}(\mathbf{T}_p) \mathbb{1}_{(0,1)}(c)(1 + \sqrt{c})^2 \right];$$

(5) as  $n, p \rightarrow \infty$ ,

$$\begin{aligned} &\sup_z \sqrt{n} \left\| \mathbf{x}_p^\top (\underline{m}_{F^{c_n, H_p}}(z) \mathbf{T}_p - \mathbf{I}_p)^{-1} \mathbf{x}_p \right. \\ &\quad \left. - \int \frac{1}{1 + t \underline{m}_{F^{c_n, H_p}}(z)} dH_n(t) \right\| \rightarrow 0. \end{aligned}$$

Define  $G_p(x) = \sqrt{n}(F_1^{\mathbf{A}_p}(x) - F^{\mathbf{A}_p}(x))$ , then the random vectors

$$\left( \int g_1(x) dG_p(x), \dots, \int g_k(x) dG_p(x) \right)$$

forms a tight sequence and converges weakly to a Gaussian vector  $\mathbf{x}_{g_1}, \dots, \mathbf{x}_{g_k}$  with mean zero and covariance function

$$\begin{aligned} \text{Cov}(\mathbf{x}_{g_1}, \mathbf{x}_{g_2}) &= -\frac{1}{2\pi^2} \int_{C_1} \int_{C_2} g_1(z_1) g_2(z_2) \\ &\quad \times \frac{(z_2 \underline{m}_2 - z_1 \underline{m}_1)^2}{c^2 z_1 z_2 (z_2 - z_1) (\underline{m}_2 - \underline{m}_1)} dz_1 dz_2. \end{aligned}$$

The contours  $C_1, C_2$  are disjoint, both contained in the analytic region for the functions  $(g_1, \dots, g_k)$  and enclose the support of  $F^{c_n, H_p}$  for all large  $p$ .

(6) If  $H(x)$  satisfies

$$\begin{aligned} &\int \frac{dH(t)}{(1 + t \underline{m}(z_1))(1 + t \underline{m}(z_2))} \\ &= \int \frac{dH(t)}{1 + t \underline{m}(z_1)} \int \frac{dH(t)}{1 + t \underline{m}(z_2)}, \end{aligned}$$

then the covariance function can be further simplified to

$$\begin{aligned} &\text{Cov}(\mathbf{x}_{g_1}, \mathbf{x}_{g_2}) \\ &= \frac{2}{c} \left( \int g_1(x) g_2(x) dF^{c, H}(x) \right. \\ &\quad \left. - \int g_1(x) dF^{c, H}(x) \int g_2(x) dF^{c, H}(x) \right). \end{aligned}$$

Recall that  $B_{\mathbf{X}}(\hat{\beta}, \beta) = \lim_{z \rightarrow 0^+} z \beta^\top (\hat{\Sigma} + z \mathbf{I}_p)^{-1} \beta$ . Let  $g(x) = 1/(x + z)$  and  $\mathbf{x}_p = \beta/r$ . Then we have

$$\begin{aligned} &\int g(x) dG_n(x) \\ &= \sqrt{n} \left( \frac{1}{r^2} \beta^\top (\hat{\Sigma} + z \mathbf{I}_p)^{-1} \beta - \int g(x) dF_{c_n}(x) \right), \end{aligned}$$

where  $F_{c_n}(x)$  is the standard Marcenko-Pastur law with parameter  $c_n$ . It is not difficult to check that under Assumptions (A1), (B1) and (C1), all the conditions (1)-(6) in Lemma 2.1 are satisfied.

To proceed further, denote  $a = (1 - \sqrt{c})^2$ ,  $b = (1 + \sqrt{c})^2$ . If  $c$  is replaced by  $c_n$ ,  $a$  and  $b$  are denoted by  $a_n$  and  $b_n$

respectively. By some algebraic calculations, we have

$$\begin{aligned}
 & \int g(x) dF_{c_n}(x) \\
 = & \left(1 - \frac{1}{c_n}\right) \cdot \frac{1}{z} \\
 & + \int_{a_n}^{b_n} \frac{1}{x+z} \cdot \frac{1}{2\pi c_n x} \sqrt{(b_n-x)(x-a_n)} dx \\
 = & \left(1 - \frac{1}{c_n}\right) \cdot \frac{1}{z} \\
 & - \frac{-1 + c_n + z - \sqrt{c_n^2 + 2c_n(z-1) + (1+z)^2}}{2c_n z},
 \end{aligned}$$

and

$$\begin{aligned}
 & \text{Var}(x_g) \\
 = & \frac{2}{c} \left( \int \{g(x)\}^2 dF_c(x) - \left\{ \int g(x) dF_c(x) \right\}^2 \right) \\
 = & \frac{2}{c} \left\{ \left(1 - \frac{1}{c}\right) \cdot \frac{1}{z^2} \right. \\
 & + \left. \int_a^b \frac{1}{(x+z)^2} \cdot \frac{1}{2\pi c x} \sqrt{(b-x)(x-a)} dx \right\} \\
 & - \frac{2}{c} \left\{ \left(1 - \frac{1}{c}\right) \cdot \frac{1}{z} \right. \\
 & + \left. \int_a^b \frac{1}{x+z} \cdot \frac{1}{2\pi c x} \sqrt{(b-x)(x-a)} dx \right\}^2.
 \end{aligned}$$

Therefore,

$$\begin{aligned}
 \lim_{z \rightarrow 0^+} z \int g(x) dF_{c_n}(x) &= 1 - \frac{1}{c_n}, \\
 \lim_{z \rightarrow 0^+} z^2 \text{Var}(x_g) &= \frac{2(c-1)}{c^3}.
 \end{aligned}$$

Furthermore, as  $n, p \rightarrow \infty$ ,  $p/n = c_n \rightarrow c > 1$ ,

$$\sqrt{n} \left( B_{\mathbf{X}}(\hat{\boldsymbol{\beta}}, \boldsymbol{\beta}) - \left(1 - \frac{1}{c_n}\right) r^2 \right) \xrightarrow{d} N\left(0, \frac{2(c-1)}{c^3} r^4\right).$$

This can be rewritten as

$$\sqrt{p} \left( B_{\mathbf{X}}(\hat{\boldsymbol{\beta}}, \boldsymbol{\beta}) - \left(1 - \frac{1}{c_n}\right) r^2 \right) \xrightarrow{d} N\left(0, \frac{2(c-1)}{c^2} r^4\right).$$

Next we deal with the variance term  $V_{\mathbf{X}}(\hat{\boldsymbol{\beta}}, \boldsymbol{\beta})$ . According to the Assumption (B1), the variance term is

$$V_{\mathbf{X}}(\hat{\boldsymbol{\beta}}, \boldsymbol{\beta}) = \frac{\sigma^2}{n} \text{Tr}\{\hat{\boldsymbol{\Sigma}}^+\} = \frac{\sigma^2}{n} \sum_{i=1}^n \frac{1}{s_i},$$

where  $s_i$ ,  $i = 1, \dots, n$  are the nonzero eigenvalues of  $\mathbf{X}^T \mathbf{X}/n$ . Let  $\{t_i, i = 1, \dots, n\}$  denote the non-zero eigen-

values of  $\mathbf{X}\mathbf{X}^T/p$ , then we have

$$\begin{aligned}
 V_{\mathbf{X}}(\hat{\boldsymbol{\beta}}, \boldsymbol{\beta}) &= \frac{\sigma^2}{p} \sum_{i=1}^n \frac{1}{t_i} \\
 &= \frac{\sigma^2 n}{p} \int \frac{1}{t} dF_{\mathbf{X}\mathbf{X}^T/p}(t) \\
 &\rightarrow \frac{\sigma^2}{c-1}.
 \end{aligned}$$

By interchanging the role of  $p$  and  $n$ , from the result in Theorem 4.1, as  $n, p \rightarrow \infty$ ,  $p/n = c_n \rightarrow c > 1$ , we have that the term

$$\sum_{i=1}^n \frac{1}{t_i} - \frac{n}{1-c'_n}$$

weakly converges to a normal distribution:

$$N\left(\frac{c'}{(c'-1)^2} + \frac{c'(\nu_4-3)}{1-c'}, \frac{2c'}{(c'-1)^4} + \frac{c'(\nu_4-3)}{(1-c')^2}\right),$$

where  $c'_n = n/p = 1/c_n$ ,  $c' = 1/c$ . This result can be rewritten as

$$\begin{aligned}
 & \sum_{i=1}^n \frac{1}{t_i} - \frac{p}{c_n - 1} \\
 \xrightarrow{d} & N\left(\frac{c}{(1-c)^2} + \frac{(\nu_4-3)}{c-1}, \frac{2c^3}{(1-c)^4} + \frac{c(\nu_4-3)}{(c-1)^2}\right).
 \end{aligned}$$

Hence the CLT of  $V_{\mathbf{X}}(\hat{\boldsymbol{\beta}}, \boldsymbol{\beta})$  is given by

$$\begin{aligned}
 & p \left( V_{\mathbf{X}}(\hat{\boldsymbol{\beta}}, \boldsymbol{\beta}) - \frac{\sigma^2}{c_n - 1} \right) \\
 \xrightarrow{d} & N\left(\frac{c\sigma^2}{(1-c)^2} + \frac{\sigma^2(\nu_4-3)}{c-1}, \frac{2c^3\sigma^4}{(1-c)^4} + \frac{c\sigma^4(\nu_4-3)}{(c-1)^2}\right).
 \end{aligned}$$

Notice that  $\text{Cov}\left(B_{\mathbf{X}}(\hat{\boldsymbol{\beta}}, \boldsymbol{\beta}), V_{\mathbf{X}}(\hat{\boldsymbol{\beta}}, \boldsymbol{\beta})\right) = 0$ . According to the consistency rate and the limiting distribution of  $B_{\mathbf{X}}(\hat{\boldsymbol{\beta}}, \boldsymbol{\beta})$  and  $V_{\mathbf{X}}(\hat{\boldsymbol{\beta}}, \boldsymbol{\beta})$ , we know that the bias  $B_{\mathbf{X}}(\hat{\boldsymbol{\beta}}, \boldsymbol{\beta})$  is the leading term of  $R_{\mathbf{X}}(\hat{\boldsymbol{\beta}}, \boldsymbol{\beta})$ . This implies that

$$\sqrt{p} \left\{ R_{\mathbf{X}}(\hat{\boldsymbol{\beta}}, \boldsymbol{\beta}) - \left(1 - \frac{1}{c_n}\right) \|\boldsymbol{\beta}\|_2^2 - \frac{\sigma^2}{c_n - 1} \right\} \xrightarrow{d} N(0, \sigma_{c,1}^2),$$

where  $\sigma_{c,1}^2 = 2(c-1)r^4/c^2$ . A practical version of this CLT is given by

$$\sqrt{p} \left\{ R_{\mathbf{X}}(\hat{\boldsymbol{\beta}}, \boldsymbol{\beta}) - \left(1 - \frac{1}{c_n}\right) \|\boldsymbol{\beta}\|_2^2 - \frac{\sigma^2}{c_n - 1} \right\} \xrightarrow{d} N(\tilde{\mu}_{c,1}, \tilde{\sigma}_{c,1}^2),$$

where

$$\tilde{\mu}_{c,1} = \frac{1}{\sqrt{p}} \left\{ \frac{c\sigma^2}{(1-c)^2} + \frac{\sigma^2(\nu_4-3)}{c-1} \right\},$$

$$\tilde{\sigma}_{c,1}^2 = \frac{2(c-1)}{c^2} r^4 + \frac{1}{p} \left\{ \frac{2c^3\sigma^4}{(1-c)^4} + \frac{c\sigma^4(\nu_4-3)}{(c-1)^2} \right\}.$$

### 3. Proof of Theorem 4.4

First we consider the bias term  $B_{\mathbf{X}}(\hat{\beta}, \beta)$ . By Assumption (A1), (B1), and (C2),

$$\begin{aligned} B_{\mathbf{X}}(\hat{\beta}, \beta) &= \mathbb{E}[\beta^{\top} \Pi \Sigma \Pi \beta | \mathbf{X}] = \mathbb{E}[\beta^{\top} \Pi \beta | \mathbf{X}] \\ &= \text{Tr} \left\{ (\mathbf{I}_p - \hat{\Sigma}^+ \hat{\Sigma}) \mathbb{E}(\beta \beta^{\top} | \mathbf{X}) \right\} \\ &= \frac{r^2}{p} \text{Tr} \{ \mathbf{I}_p - \hat{\Sigma}^+ \hat{\Sigma} \} = r^2(1 - n/p). \end{aligned}$$

Alternatively, we can rewrite the bias as

$$\begin{aligned} B_{\mathbf{X}}(\hat{\beta}, \beta) &= \lim_{z \rightarrow 0^+} \mathbb{E}[\beta^{\top} (\mathbf{I}_p - (\hat{\Sigma} + z \mathbf{I}_p)^{-1} \hat{\Sigma}) \beta | \mathbf{X}] \\ &= \lim_{z \rightarrow 0^+} \mathbb{E}[z \beta^{\top} (\hat{\Sigma} + z \mathbf{I}_p)^{-1} \beta | \mathbf{X}] \\ &= \lim_{z \rightarrow 0^+} z \frac{r^2}{p} \text{Tr}(\hat{\Sigma} + z \mathbf{I}_p)^{-1}. \end{aligned}$$

Define that  $f_n(z) = z \frac{r^2}{p} \text{Tr}(\hat{\Sigma} + z \mathbf{I}_p)^{-1}$ . Notice that  $|f_n(z)|$  and  $|f'_n(z)|$  are bounded above. By the Arzela-Ascoli theorem, we deduce that  $f_n(z)$  converges uniformly to its limit. Under Assumption (C2), by the Moore-Osgood theorem, almost surely,

$$\begin{aligned} &\lim_{n, p \rightarrow \infty} B_{\mathbf{X}}(\hat{\beta}, \beta) \\ &= \lim_{z \rightarrow 0^+} \lim_{n, p \rightarrow \infty} z \frac{r^2}{p} \text{Tr}(\hat{\Sigma} + z \mathbf{I}_p)^{-1} \\ &= \lim_{z \rightarrow 0^+} \lim_{n, p \rightarrow \infty} z \frac{r^2}{p} \text{Tr} \left( \frac{1}{n} \mathbf{X} \mathbf{X}^{\top} + z \mathbf{I}_n \right)^{-1}, \end{aligned}$$

In fact,

$$\lim_{n, p \rightarrow \infty} B_{\mathbf{X}}(\hat{\beta}, \beta) = r^2 \lim_{z \rightarrow 0^+} \lim_{n, p \rightarrow \infty} z m_n(-z),$$

where  $m_n(z)$  is the Stieltjes transform of empirical spectral distribution of  $\hat{\Sigma} = \mathbf{X}^{\top} \mathbf{X} / n$ . According to Theorem 2.1 in (Zheng et al., 2015) and Lemma 1.1 in (Bai & Siliverstein, 2004), the truncated version of  $p(m_n(z) - m(z))$  converges weakly to a two-dimensional Gaussian process  $M(\cdot)$  satisfying

$$\begin{aligned} \mathbb{E}[M(z)] &= \frac{c \underline{m}^3 (1 + \underline{m})}{\{(1 + \underline{m})^2 - c \underline{m}^2\}^2} \\ &\quad + \frac{c(\nu_4 - 3) \underline{m}^3}{(1 + \underline{m}) \{(1 + \underline{m})^2 - c \underline{m}^2\}}, \end{aligned}$$

and

$$\begin{aligned} &\text{Cov}(M(z_1), M(z_2)) \\ &= 2 \left\{ \frac{m'(z_1) \underline{m}'(z_2)}{(\underline{m}(z_1) - \underline{m}(z_2))^2} - \frac{1}{(z_1 - z_2)^2} \right\} \\ &\quad + \frac{c(\nu_4 - 3) m'(z_1) \underline{m}'(z_2)}{(1 + \underline{m}(z_1))^2 (1 + \underline{m}(z_2))^2}, \end{aligned}$$

where  $\underline{m} = \underline{m}(z)$  represents the Stieltjes transform of limiting spectral distribution of companion matrix  $\mathbf{X} \mathbf{X}^{\top} / n$  satisfying the equation

$$z = -\frac{1}{\underline{m}} + \frac{c}{1 + \underline{m}}, \quad \underline{m}(z) = -\frac{1 - c}{z} + c \underline{m}(z).$$

When  $p > n$ , we can actually solve  $\underline{m}(z)$  equation and obtain that

$$\begin{aligned} \underline{m}(z) &= \frac{-1 + c - z + \sqrt{-4z + (1 - c + z)^2}}{2z}, \\ m(z) &= \frac{1 - c - z + \sqrt{-4z + (1 - c + z)^2}}{2cz}. \end{aligned}$$

Therefore, by some algebraic calculations, we have

$$\begin{aligned} &\lim_{n, p \rightarrow \infty} B_{\mathbf{X}}(\hat{\beta}, \beta) \\ &= \lim_{n, p \rightarrow \infty} r^2 \lim_{z \rightarrow 0^+} z m_n(-z) \\ &= r^2 \lim_{z \rightarrow 0^+} \left\{ z m(-z) + z \left(1 - \frac{1}{c}\right) \frac{1}{z} \right\} \\ &= \lim_{n, p \rightarrow \infty} r^2 \lim_{z \rightarrow 0^+} z \frac{n}{p} m_n(z) \\ &= r^2 \frac{1}{c} \lim_{z \rightarrow 0^+} z \underline{m}(-z) \\ &= r^2 \left(1 - \frac{1}{c}\right). \end{aligned}$$

Moreover,

$$\begin{aligned} \text{Var}(M(z)) &= \lim_{z_1 \rightarrow z_2 = z} \text{Cov}(M(z_1), M(z_2)) \\ &= \frac{2 \underline{m}'(z) \underline{m}'''(z) - 3(\underline{m}''(z))^2}{6(\underline{m}'(z))^2} \\ &\quad + \frac{c(\nu_4 - 3)(\underline{m}'(z))^2}{(1 + \underline{m}(z))^4}. \end{aligned}$$

By substituting of the explicit form of  $\underline{m}(z)$ , we can easily derive that

$$\lim_{z \rightarrow 0^+} z \mathbb{E}[M(-z)] = 0, \quad \lim_{z \rightarrow 0^+} z^2 \text{Var}(M(-z)) = 0,$$

which means that the second-order limit of  $B_{\mathbf{X}}(\hat{\beta}, \beta)$  is still  $r^2(1 - 1/c)$ . All in all,  $B_{\mathbf{X}}(\hat{\beta}, \beta)$  is identical with a constant  $r^2(1 - 1/c)$  in distribution.

On the other hand, by Assumption (B1),

$$V_{\mathbf{X}}(\hat{\beta}, \beta) = \frac{\sigma^2}{n} \text{Tr}\{\hat{\Sigma}^+\} = \frac{\sigma^2}{n} \sum_{i=1}^n \frac{1}{s_i},$$

where  $s_i, i = 1, \dots, n$  are the nonzero eigenvalues of  $\mathbf{X}^{\top} \mathbf{X} / n$ . Similar to the proof of Theorem 4.3, the CLT of  $V_{\mathbf{X}}(\hat{\beta}, \beta)$  is given by

$$\begin{aligned} &p \left( V_{\mathbf{X}}(\hat{\beta}, \beta) - \frac{\sigma^2}{c_n - 1} \right) \\ &\xrightarrow{d} N \left( \frac{c \sigma^2}{(1 - c)^2} + \frac{\sigma^2(\nu_4 - 3)}{c - 1}, \frac{2c^3 \sigma^4}{(1 - c)^4} + \frac{c \sigma^4(\nu_4 - 3)}{(c - 1)^2} \right). \end{aligned}$$

Combining the results of  $B_{\mathbf{X}}(\hat{\beta}, \beta)$  and  $V_{\mathbf{X}}(\hat{\beta}, \beta)$ , we have

$$p \left\{ R_{\mathbf{X}}(\hat{\beta}, \beta) - r^2 \left(1 - \frac{1}{c_n}\right) - \frac{\sigma^2}{c_n - 1} \right\} \xrightarrow{d} N(\mu_{c,2}, \sigma_{c,2}^2),$$

where

$$\begin{aligned} \mu_{c,2} &= \frac{c\sigma^2}{(1-c)^2} + \frac{\sigma^2(\nu_4 - 3)}{c-1}, \\ \sigma_{c,2}^2 &= \frac{2c^3\sigma^4}{(1-c)^4} + \frac{c\sigma^4(\nu_4 - 3)}{(c-1)^2}. \end{aligned}$$

#### 4. Proof of Theorem 4.5

Note that under Assumption (B1) and (C2),  $B_{\mathbf{X},\beta}(\hat{\beta}, \beta) = \beta^T \Pi \beta = \beta^T (\mathbf{I}_p - \hat{\Sigma}^+ \hat{\Sigma}) \beta$ . If we directly consider  $\beta^T (\mathbf{I}_p - \hat{\Sigma}^+ \hat{\Sigma}) \beta$ , we can make use of the asymptotic results for quadratic forms, see Theorem 7.2 in Bai & Yao (2008), which is stated as follows.

**Lemma 4.1. (Theorem 7.2 in Bai & Yao (2008))** *Let  $\{\mathbf{A}_n = [a_{ij}(n)]\}$  be a sequence of  $n \times n$  real symmetric matrices,  $\{\mathbf{x}_i\}_{i \in \mathbb{N}}$  be a sequence of i.i.d.  $K$  dimensional real random vectors, with  $\mathbb{E}(\mathbf{x}_i) = 0$ ,  $\mathbb{E}(\mathbf{x}_i \mathbf{x}_i^T) = (\gamma_{ij})_{K \times K}$  and  $\mathbb{E}[\|\mathbf{x}_i\|^4] < \infty$ . Denote*

$$\begin{aligned} \mathbf{x}_i &= (x_{\ell i})_{K \times 1}, \quad \mathbf{X}(\ell) = (x_{\ell 1}, \dots, x_{\ell n})^T, \\ \ell &= 1, \dots, K, \quad i = 1, \dots, n, \end{aligned}$$

assume the following limits exist

$$\omega = \lim_{n \rightarrow \infty} \frac{1}{n} \sum_{i=1}^n a_{ii}^2(n), \quad \theta = \lim_{n \rightarrow \infty} \frac{1}{n} \text{Tr} \mathbf{A}_n^2.$$

Define a  $K$ -dimensional random vectors,

$$\mathbf{z}_n = (z_{n,\ell})_{K \times 1},$$

where, for  $1 \leq \ell \leq K$ ,

$$z_{n,\ell} = \frac{1}{\sqrt{n}} (\mathbf{X}(\ell)^T \mathbf{A}_n \mathbf{X}(\ell) - \gamma_{\ell\ell} \text{Tr}\{\mathbf{A}_n\}).$$

Then  $\mathbf{z}_n$  converges weakly to a zero-mean Gaussian vector with covariance matrix  $\mathbf{D} = \mathbf{D}_1 + \mathbf{D}_2$ , where for any  $1 \leq \ell, \ell' \leq K$ ,

$$[\mathbf{D}_1]_{\ell\ell'} = \omega (\mathbb{E}(x_{\ell 1}^2 x_{\ell' 1}^2) - \gamma_{\ell\ell} \gamma_{\ell'\ell'}),$$

and

$$[\mathbf{D}_2]_{\ell\ell'} = (\theta - \omega)(\gamma_{\ell\ell'} \gamma_{\ell'\ell} + \gamma_{\ell\ell}^2)$$

According to the results in Lemma 4.1, let  $\mathbf{A}_n = \Pi = \mathbf{I}_p - \hat{\Sigma}^+ \hat{\Sigma}$ , then we have, as  $p \rightarrow \infty$ ,

$$\sqrt{p} \left\{ \beta^T \Pi \beta - \frac{r^2}{p} \text{Tr}(\Pi) \right\} \xrightarrow{d} N(0, d^2 = d_1^2 + d_2^2),$$

where

$$\omega = \lim_{p \rightarrow \infty} \frac{1}{p} \sum_{i=1}^p \Pi_{ii}^2, \quad \theta = \lim_{p \rightarrow \infty} \frac{1}{p} \text{Tr}(\Pi^2) = 1 - \frac{1}{c},$$

and

$$\begin{aligned} d_1^2 &= \omega \{ \mathbb{E}(x_{\ell 1}^2 x_{\ell' 1}^2) - \gamma_{\ell\ell}^2 \} = \omega \left( \frac{p^2}{r^4} \mathbb{E}(\beta_i^4) - 1 \right) r^4, \\ d_2^2 &= (\theta - \omega)(\gamma_{\ell\ell}^2 + \gamma_{\ell'\ell'}^2) = 2(\theta - \omega)r^4. \end{aligned}$$

Since in the proof of Theorem 4.3, we have already shown that

$$\frac{r^2}{p} \text{Tr}(\Pi) = r^2 \left(1 - \frac{n}{p}\right).$$

In particular, if  $\beta$  follows multivariate Gaussian distribution, i.e.  $\beta \sim N_p(0, \frac{r^2}{p} \mathbf{I}_p)$ , then as  $p \rightarrow \infty$ ,

$$\sqrt{p} \left\{ B_{\mathbf{X},\beta}(\hat{\beta}, \beta) - r^2 \left(1 - \frac{n}{p}\right) \right\} \xrightarrow{d} N\left(0, 2\left(1 - \frac{1}{c}\right)r^4\right).$$

Moreover,  $V_{\mathbf{X},\beta}(\hat{\beta}, \beta) = V_{\mathbf{X}}(\hat{\beta}, \beta)$ , we have already proved in Theorem 4.3 that

$$\begin{aligned} & p(V_{\mathbf{X},\beta}(\hat{\beta}, \beta) - \frac{\sigma^2}{c_n - 1}) \\ & \xrightarrow{d} N\left(\frac{c\sigma^2}{(1-c)^2} + \frac{\sigma^2(\nu_4 - 3)}{c-1}, \frac{2c^3\sigma^4}{(1-c)^4} + \frac{c\sigma^4(\nu_4 - 3)}{(c-1)^2}\right). \end{aligned}$$

Note that  $\text{Cov}(B_{\mathbf{X},\beta}(\hat{\beta}, \beta), V_{\mathbf{X},\beta}(\hat{\beta}, \beta)) = 0$ . According to the consistency rate of  $B_{\mathbf{X},\beta}(\hat{\beta}, \beta)$  and  $V_{\mathbf{X},\beta}(\hat{\beta}, \beta)$ , we know that the bias  $B_{\mathbf{X}}(\hat{\beta}, \beta)$  is the leading term of  $R_{\mathbf{X},\beta}(\hat{\beta}, \beta)$ . This implies that

$$\sqrt{p} \left\{ R_{\mathbf{X},\beta}(\hat{\beta}, \beta) - r^2 \left(1 - \frac{1}{c_n}\right) - \frac{\sigma^2}{c_n - 1} \right\} \xrightarrow{d} N(0, \sigma_{c,3}^2),$$

where  $\sigma_{c,3}^2 = 2r^4(1 - 1/c)$ . A practical version of this CLT is given by

$$\sqrt{p} \left\{ R_{\mathbf{X},\beta}(\hat{\beta}, \beta) - r^2 \left(1 - \frac{1}{c_n}\right) - \frac{\sigma^2}{c_n - 1} \right\} \xrightarrow{d} N(\tilde{\mu}_{c,3}, \tilde{\sigma}_{c,3}^2),$$

where

$$\begin{aligned} \tilde{\mu}_{c,3} &= \frac{1}{\sqrt{p}} \left\{ \frac{c\sigma^2}{(1-c)^2} + \frac{\sigma^2(\nu_4 - 3)}{c-1} \right\}, \\ \tilde{\sigma}_{c,3}^2 &= 2\left(1 - \frac{1}{c}\right)r^4 + \frac{1}{p} \left\{ \frac{2c^3\sigma^4}{(1-c)^4} + \frac{c\sigma^4(\nu_4 - 3)}{(c-1)^2} \right\}. \end{aligned}$$

## 5. More experiments

### 5.1. More results of Example 1

In this example, we consider the anisotropic case that the covariance matrix  $\Sigma$  is not an identity matrix. We check Theorem 4.1 and define a statistic

$$T_n = \frac{p}{\sigma_c} \left( R_{\mathbf{X}}(\hat{\beta}, \beta) - \sigma^2 \frac{c_n}{1 - c_n} \right) - \frac{\mu_c}{\sigma_c}.$$

According to Theorem 4.1,  $T_n$  weakly converges to the standard normal distribution as  $n, p \rightarrow \infty$ . In this example, we take  $c = 1/2$  and  $p = 50, 100, 200$ . To make sure the assumption (A) holds, the generative distribution  $P_{\mathbf{x}}$  is taken to be the standard normal distribution, the centered gamma with shape 4.0 and scale 0.5, and the normalized Student-t distribution with 6.0 degree of freedom. The covariance matrix  $\Sigma$  is taken to be

$$\Sigma = 0.7\mathbf{I}_p + 0.3\mathbf{1}_p\mathbf{1}_p^T.$$

The finite-sample distribution of  $T_n$  is estimated by the histogram of  $T_n$  under 1000 repetitions. The results are presented in Figure 1. One can find that the finite-sample distribution of  $T_n$  tends to the standard normal distribution as  $n, p \rightarrow +\infty$ . When  $\alpha = 0.05$ , the empirical cover rates of the 95%-confidence interval are reported in Figure 2.

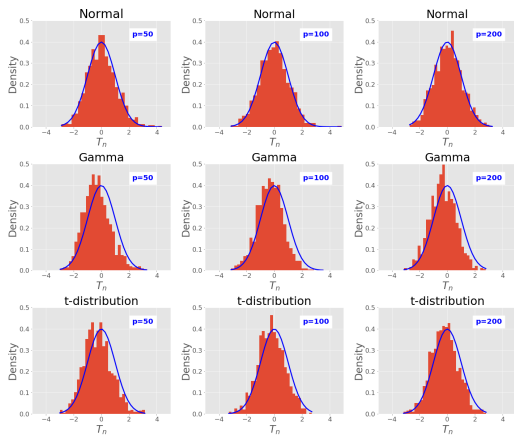

Figure 1. The histogram of  $T_n$ . The solid line is the density of the standard normal distribution.

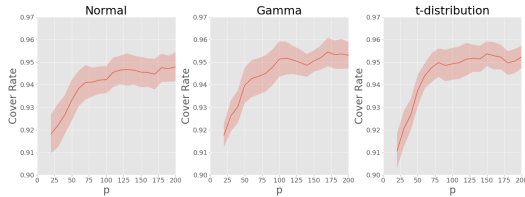

Figure 2. The cover rate of the confidence interval as  $p$  creases. The confidence level is 95%.

## 5.2. Example 3

This example checks Theorem 4.3. To proceed further, we denote two statistics:

$$T_{n,2} = \frac{\sqrt{p}}{\sigma_{c,1}} \left\{ R_{\mathbf{X}}(\hat{\beta}, \beta) - \left(1 - \frac{1}{c_n}\right)r^2 - \frac{\sigma^2}{c_n - 1} \right\} - \frac{\mu_{c,1}}{\sigma_{c,1}},$$

$$T_{n,3} = \frac{\sqrt{p}}{\tilde{\sigma}_{c,1}} \left\{ R_{\mathbf{X}}(\hat{\beta}, \beta) - \left(1 - \frac{1}{c_n}\right)r^2 - \frac{\sigma^2}{c_n - 1} \right\} - \frac{\tilde{\mu}_{c,1}}{\tilde{\sigma}_{c,1}}.$$

According to the central limit theorem (8) and its practical version, both  $T_{n,2}$  and  $T_{n,3}$  weakly converge to the standard normal distribution as  $n, p \rightarrow +\infty$ . We take  $c = 2$  and  $p = 100, 200, 400$ . The finite-sample distributions of  $T_{n,2}$  and  $T_{n,3}$  are estimated by the histogram of  $T_{n,2}$  and  $T_{n,3}$  under 1000 repetitions. The results are presented at Figure 3 and Figure 4. One can see that the finite-sample distributions of  $T_{n,2}$  and  $T_{n,3}$  are close to the standard normal distribution, and the finite-sample performance of  $T_{n,3}$  is better than that of  $T_{n,2}$ . When  $\alpha = 0.05$ , the empirical cover rates of the 95%-confidence interval (9) are reported in Figure 5.

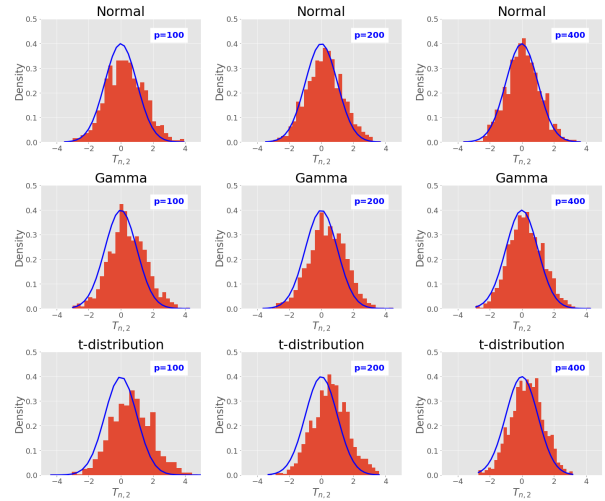

Figure 3. The histogram of  $T_{n,2}$ . The solid line is the density of the standard normal distribution.

## 5.3. An anisotropic example for Remark 4.2

In the over-parameterized case, the bias term  $B_{\mathbf{X}}(\hat{\beta}, \beta) = \beta^T \Pi \Sigma \Pi \beta$  is non-zero while the variance term  $V_{\mathbf{X}}(\hat{\beta}, \beta)$  remains the same as under-parameterized case. Therefore in this section, we conduct a small simulation to examine the fluctuation of the bias  $B_{\mathbf{X}}$  for both isotropic and anisotropic  $\Sigma$  in the over-parameterized case with non-random  $\beta$  satisfying Assumption (C1). In particular, in the following we set  $r = 1$ .

We consider both localized and delocalized  $\beta$  such that

1. Localized case:  $\beta_1 = (1, 0, \dots, 0)$ ;

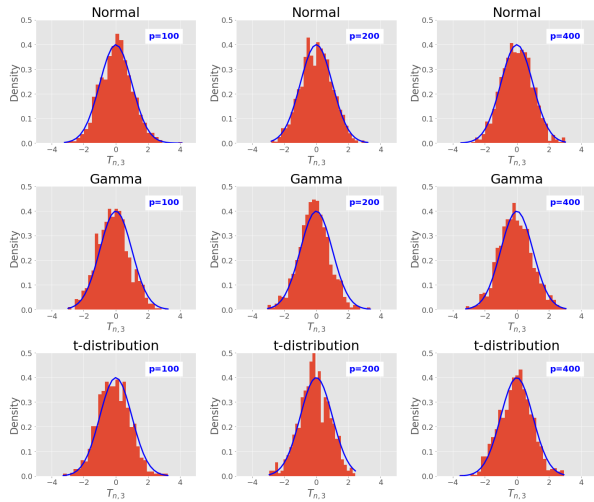

Figure 4. The histogram of  $T_{n,3}$ . The solid line is the density of the standard normal distribution.

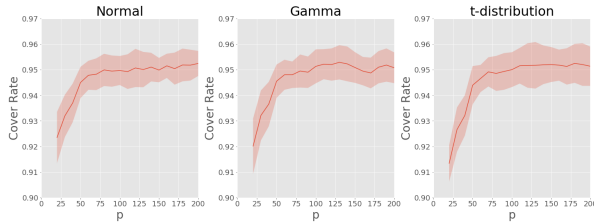

Figure 5. The coverage of confidence interval (9) as  $p$  increases. The confidence level is 95%.

2. Delocalized case:  $\beta_2 = \frac{1}{\sqrt{p}}(1, \dots, 1)$ ;

and both the isotropic and anisotropic  $\Sigma$

3. Identity case:  $\Sigma_1 = \mathbf{I}_p$ ;

4. Compound symmetric case:  $\Sigma_2 = 0.5\mathbf{I}_p + 0.5\mathbf{1}_p\mathbf{1}_p^T$ .

Then we fix  $p/n = 2$  and let  $p$  vary from 10 to 300, we present in Figure 6 the empirical variance of  $\sqrt{p} * B_{\mathbf{X}}$  and  $p * B_{\mathbf{X}}$  under various combinations of  $\Sigma$  and  $\beta$  with 1000 replications.

From the plot on the top left panel in Figure 6, we can see that the variance of  $\sqrt{p} * B_{\mathbf{X}}$  for both  $\beta_1$  and  $\beta_2$  remain constant as  $p$  grows, which indicates that the convergence rate of  $B_{\mathbf{X}}$  is  $1/\sqrt{p}$  under the isotropic case regardless of localized or delocalized  $\beta$ . As for the anisotropic case on the top right corner, the variance of  $\sqrt{p} * B_{\mathbf{X}}$  stabilizes for  $\beta_1$ , while decays for  $\beta_2$ , which indicates that convergence rate of  $B_{\mathbf{X}}$  under  $(\Sigma_2, \beta_2)$  and  $(\Sigma_2, \beta_1)$  are different.

This simulation result further confirms our conjecture that in the over-parameterized case, there is no universal CLT for

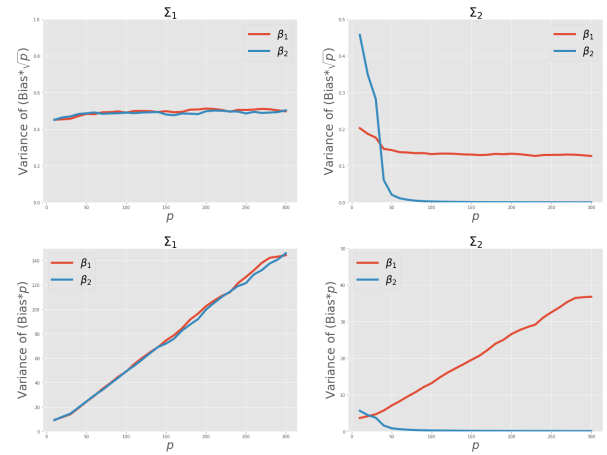

Figure 6. The upper panels are the empirical variances of  $\sqrt{p} * B_{\mathbf{X}}$ , the lower panels are for  $p * B_{\mathbf{X}}$ .

the prediction risk  $R_{\mathbf{X}}(\hat{\beta}, \beta)$  under the anisotropic setting for non-random  $\beta$ .

## References

- Bai, Z. and Silverstein, J. CLT for linear spectral statistics of large-dimensional sample covariance matrices. *The Annals of Probability*, 32:553–605, 2004.
- Bai, Z. and Yao, J. Central limit theorems for eigenvalues in a spiked population model. *Annales de l’IHP Probabilités et statistiques*, 44(3):447–474, 2008.
- Bai, Z. and Yin, Y. Limit of the smallest eigenvalue of a large dimensional sample covariance matrix. In *Advances In Statistics*, pp. 108–127. World Scientific, 2008.
- Bai, Z., Miao, B., and Pan, G. On asymptotics of eigenvectors of large sample covariance matrix. *The Annals of Probability*, 35(4):1532–1572, 2007.
- Pan, G. and Zhou, W. Central limit theorem for signal-to-interference ratio of reduced rank linear receiver. *The Annals of Applied Probability*, 18(3):1232–1270, 2008.
- Yin, Y. Limiting spectral distribution for a class of random matrices. *Journal of multivariate analysis*, 20(1):50–68, 1986.
- Zheng, S., Bai, Z., and Yao, J. Substitution principle for clt of linear spectral statistics of high-dimensional sample covariance matrices with applications to hypothesis testing. *The Annals of Statistics*, 43(2):546–591, 2015.
